# Supplementary material
Source: bioRxiv or medRxiv preprint supplement (https://medrxiv.org/highwire/filestream/71501/field_highwire_adjunct_files/2/2020.01.24.20018648-3.pdf)
Supplement: Supplementary file [file 2020.01.24.20018648-3.pdf]

Supplemental Table 3. Binary Logistic Regression including Resting PD, Age, Sex, and FSIQ as predictors of ASD diagnostic status.

|          |           | Predicted      |           |              |
|----------|-----------|----------------|-----------|--------------|
|          |           | ASD Dx Present |           | % Correct    |
|          |           | 0 ('No')       | 1 ('Yes') |              |
| Observed | 0 ('No')  | 22             | 8         | 73.3         |
|          | 1 ('Yes') | 8              | 35        | 81.4         |
|          | Overall % |                |           | <b>78.1%</b> |

( $\chi^2(4) = 34.67, p < 0.0001$ )

Nagelkerke  $R^2 = 0.51$

|            | $\beta$ | SE   | Exp( $\beta$ ) | 95% Confidence Interval for |             | Wald  | <i>p</i> -value |
|------------|---------|------|----------------|-----------------------------|-------------|-------|-----------------|
|            |         |      |                | Exp( $\beta$ )              |             |       |                 |
|            |         |      |                | Lower Bound                 | Upper Bound |       |                 |
| FSIQ       | -0.07   | 0.02 | 0.97           | 0.90                        | 0.97        | 11.76 | 0.001**         |
| Sex        | 1.96    | 0.66 | 7.14           | 1.95                        | 26.13       | 8.81  | 0.003**         |
| Age        | -0.03   | 0.15 | 0.84           | 0.72                        | 1.30        | 0.04  | 0.837           |
| Resting PD | 0.91    | 0.40 | 2.49           | 1.14                        | 5.40        | 5.28  | 0.022*          |
| Constant   | 4.57    | 2.56 | 96.19          |                             |             | 3.19  | 0.075           |

Note: \* indicates correlation is significant at the 0.05 level (two-tailed); \*\* indicates correlation is significant at the 0.01 level.
